# Supplementary material for: In vitro toxicity and bioimaging studies of gold nanorods formulations coated with biofunctional thiol-PEG molecules and Pluronic block copolymers
Source: publisher site journal article supplement (doi:10.3762/bjnano.5.64), 2014-04-30
Supplement: Additional file 1 [file 2190-4286-5-64-S1.pdf]

# Supporting Information

for

## In vitro toxicity and bioimaging studies of gold nanorods formulations coated with biofunctional thiol-PEG molecules and Pluronic block copolymers

Tianxun Gong<sup>1,2</sup>, Douglas Goh<sup>1</sup>, Malini Olivo<sup>1,3</sup> and Ken-Tye Yong<sup>\*2</sup>

Address: <sup>1</sup>Bio-Optical Imaging Group, Singapore Bioimaging Consortium (SBIC), Agency for Science Technology and Research (A\*STAR), 11 Biopolis Way, 138667 Singapore, <sup>2</sup>School of Electrical and Electronic Engineering, Nanyang Technological University, 639798 Singapore and <sup>3</sup>School of Physics, National University of Ireland, Galway, Ireland

Email: Ken-Tye Yong - ktyong@ntu.edu.sg

\*Corresponding author

### Chemical formula of PEG-SH and Pluronic (PEO-PPO-PEO)

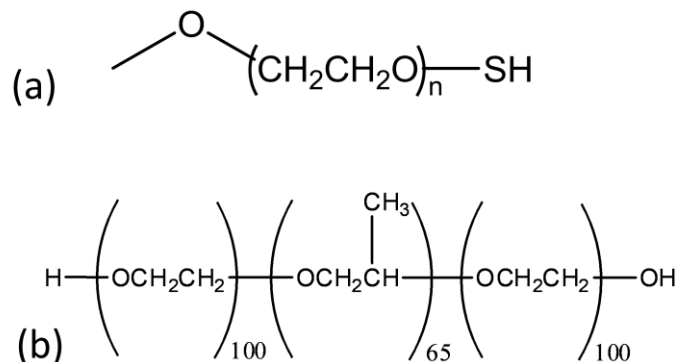

**Figure S1:** Chemical formula of (a) PEG-SH and (b) Pluronic F127.
